# Supplementary material for: Palladium catalyzes hydrogen production from formic acid: significant impact of support polypyrrole
Source: Royal Society of Chemistry journal article supplement (doi:10.1039/d2nj03831e), 2022-01-01
Supplement: d2nj03831e1.pdf [file d2nj03831e1.pdf]

## Electronic Supplementary Information

### Palladium catalyzes hydrogen production from formic acid: significant impact of support polypyrrole

Sifan Liu,<sup>a</sup> Ruixiao Ma,<sup>a</sup> Xuejing Wang,<sup>a</sup> Yanmei Chen,<sup>a</sup> Juan Xu,<sup>a</sup> Yanhui Zhang<sup>\*a</sup>

<sup>a</sup> College of Chemistry, Chemical Engineering and Environment, Fujian Province Key Laboratory of Morden Analytical Science and Separation Technology, Minnan Normal University, Zhangzhou, 363000, P.R. China

\*To whom correspondence should be addressed. E-mail Address: [zhangyh@mnnu.edu.cn](mailto:zhangyh@mnnu.edu.cn)

$$TOF = \frac{P_{atm} V_{H_2}}{RT n_{Pd} t} \quad \text{Equation S1}$$

The equation S1 can learn about the catalytic performance of Pd/PPy-S1 and Pd/PPy-S2. Where *TOF* is turnover frequency at a certain conversion of formic acid to hydrogen,  $V_{H_2}$  is the the volume of hydrogen produced,  $n_{Pd}$  is the mole number of the Pd, *R* is the universal gas constant (8.314 m<sup>3</sup>·Pa/(mol·K)),  $P_{atm}$  is the atmospheric pressure (101325 Pa), *T* is the reaction temperature at 333K, and *t* is for the reaction time of 5 h.

**Table S1** The catalyst activity data of Pd/PPy-S1 for hydrogen production from formic acid.

| Catalyst  | T/K | Solvent                        | hydrogen production/mL |
|-----------|-----|--------------------------------|------------------------|
|           | 298 | formic acid and sodium formate | 1                      |
| Pd/PPy-S1 | 333 | formic acid                    | 3                      |
|           | 333 | formic acid and sodium formate | 22                     |

**Table S2** Comparison of some catalysts used in formic acid dehydrogenation reaction.

| Catalyst           | T/K | Reactants                        | hydrogen production rate           | TOF/h <sup>-1</sup> | Reference |
|--------------------|-----|----------------------------------|------------------------------------|---------------------|-----------|
| Pd/C               | 303 | formic acid:sodium formate = 4:1 | 16.82 mL H <sub>2</sub> in 2 h     | 35.5                | 53        |
| CoAuPd NPs         | 298 | formic acid                      | 70 mL mL H <sub>2</sub> in 400 min | 13.3                | 54        |
| 150 sc% Pd-on-Au/C | 296 | formic acid                      | 22.5 mL mL H <sub>2</sub> in 3 h   | 35.2                | 55        |
| Au/MgAl-LDH        | 333 | formic acid and sodium formate   | 11.5 mL H <sub>2</sub> in 10 h     | 4.1                 | 56        |
| Pd/PPy-S1          | 333 | formic acid and sodium formate   | 22 mL H <sub>2</sub> in 5 h        | 8.6                 | This work |
| Pd/PPy-S2          | 333 | formic acid and sodium formate   | 19 mL H <sub>2</sub> in 5 h        | 7.4                 | This work |

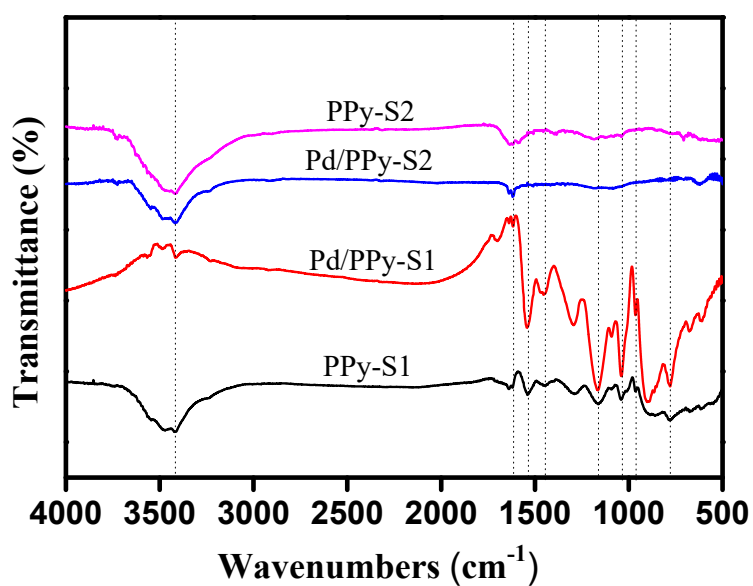**Fig. S1** FT-IR spectra of PPy and Pd/PPy.

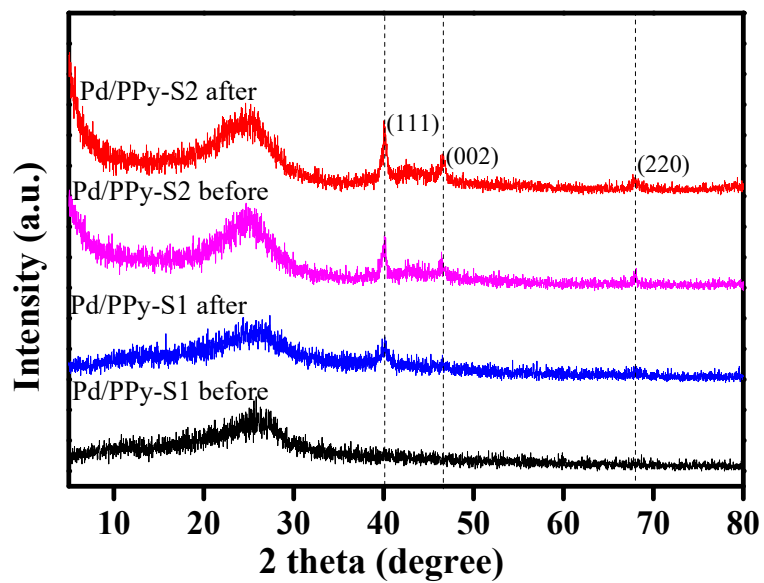

**Fig. S2** XRD patterns of Pd/PPy-S1 and Pd/PPy-S2 before and after the catalytic reaction.
